# Supplementary material
Source: PubMed Central journal article supplement (PMC5580049)
Supplement: NIHMS826757-supplement-Supplemental_Digital_Content.pdf [file NIHMS826757-supplement-Supplemental_Digital_Content.pdf]

## **Supplemental Digital Appendix 1**

### **Interview Protocol Used to Collect Stories of Change, Most Significant Change Study**

#### **Evaluating the Impact of MEPI at the UZCHS, 2014–2015**

1. In which MEPI programs have you participated at UZCHS?

*Prompts, as needed:*

- In what roles have you served in the MEPI programs? (e.g., scholar, committee member, facilitator, participant)
- Have you presented a MEPI related project/poster at a conference? If you have, what has the experience been like for you?

2. How has your participation in the MEPI programs benefitted you personally and professionally?

*Prompts, as needed:*

- Can you share an example?
- Do you recall any particularly memorable moments in any of your engagements with the MEPI program?
- If you have participated in any community of practice, do you recall any particularly memorable moments or experiences?

3. How has your participation in MEPI programs impacted your career decisions, if at all?

Abbreviations: MEPI indicates Medical Education Partnership Initiative; UZCHS, University of Zimbabwe College of Health Sciences.
